# Supplementary material for: Preparation of hydroxyapatite micropatterns for the study of cell–biomaterial interactions
Source: Royal Society of Chemistry journal article supplement (doi:10.1039/c4tb00146j), 2014-01-01
Supplement: c4tb00146j1.pdf [file c4tb00146j1.pdf]

*Supplementary Information for*

Preparation of hydroxyapatite micropattern for studies of cell-biomaterial interactions

Yao He, Xuan Wang, Liang Chen, Jiandong Ding\*

State Key Laboratory of Molecular Engineering of Polymers, Department of Macromolecular Science, Advanced Materials Laboratory, Fudan University, Shanghai 200433, China

\*Corresponding author (E-mail: [jdding1@fudan.edu.cn](mailto:jdding1@fudan.edu.cn), Tel: 86-21-65643506, Fax: 86-21-65640293)

Surface roughness ( $R_a$ , roughness average) was analyzed by atomic force microscopy (AFM, Multimode 8, Bruker Co., Germany).

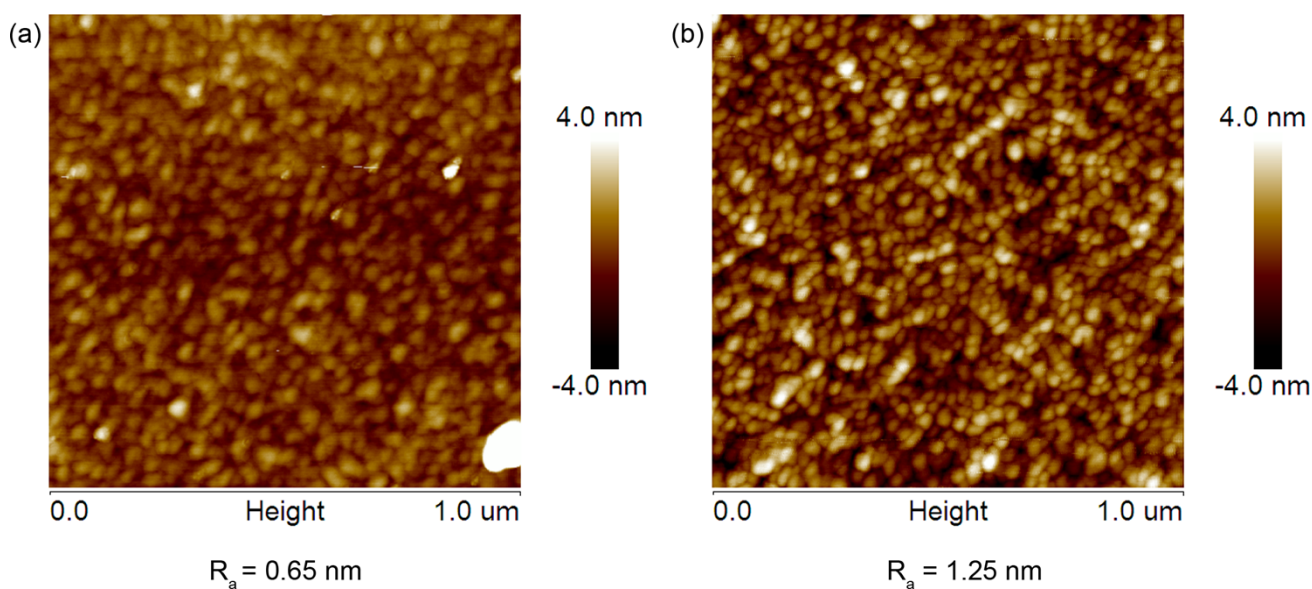

**Fig. S1** AFM images of surfaces of (a) glass and (b) gold microisland. In generating gold surfaces, Chromium was first sputtered on glass and then gold was sputtered.
